# Supplementary material for: Impact of environmental microbiota on human microbiota of workers in academic mouse research facilities: An observational study
Source: PLoS One. 2017 Jul 13;12(7):e0180969. doi: 10.1371/journal.pone.0180969 (PMC5509249; doi:10.1371/journal.pone.0180969)
Supplement: S1 Table — (XLSX) [file pone.0180969.s005.xlsx]

## Sheet: Sheet1
Accession	BioProject
SAMN07221132	PRJNA390139
SAMN07221133	PRJNA390139
SAMN07221134	PRJNA390139
SAMN07221135	PRJNA390139
SAMN07221136	PRJNA390139
SAMN07221137	PRJNA390139
SAMN07221138	PRJNA390139
SAMN07221139	PRJNA390139
SAMN07221140	PRJNA390139
SAMN07221141	PRJNA390139
SAMN07221142	PRJNA390139
SAMN07221143	PRJNA390139
SAMN07221144	PRJNA390139
SAMN07221145	PRJNA390139
SAMN07221146	PRJNA390139
SAMN07221147	PRJNA390139
SAMN07221148	PRJNA390139
SAMN07221149	PRJNA390139
SAMN07221150	PRJNA390139
SAMN07221151	PRJNA390139
SAMN07221152	PRJNA390139
SAMN07221153	PRJNA390139
SAMN07221154	PRJNA390139
SAMN07221155	PRJNA390139
SAMN07221156	PRJNA390139
SAMN07221157	PRJNA390139
SAMN07221158	PRJNA390139
SAMN07221159	PRJNA390139
SAMN07221160	PRJNA390139
SAMN07221161	PRJNA390139
SAMN07221162	PRJNA390139
SAMN07221163	PRJNA390139
SAMN07221164	PRJNA390139
SAMN07221165	PRJNA390139
SAMN07221166	PRJNA390139
SAMN07221167	PRJNA390139
SAMN07221168	PRJNA390139
SAMN07221169	PRJNA390139
SAMN07221170	PRJNA390139
SAMN07221171	PRJNA390139
SAMN07221172	PRJNA390139
SAMN07221173	PRJNA390139
SAMN07221174	PRJNA390139
SAMN07221175	PRJNA390139
SAMN07221176	PRJNA390139
SAMN07221177	PRJNA390139
SAMN07221178	PRJNA390139
SAMN07221179	PRJNA390139
SAMN07221180	PRJNA390139
SAMN07221181	PRJNA390139
SAMN07221182	PRJNA390139
SAMN07221183	PRJNA390139
SAMN07221184	PRJNA390139
SAMN07221185	PRJNA390139
SAMN07221186	PRJNA390139
SAMN07221187	PRJNA390139
SAMN07221188	PRJNA390139
SAMN07221189	PRJNA390139
SAMN07221190	PRJNA390139
SAMN07221191	PRJNA390139
SAMN07221192	PRJNA390139
SAMN07221193	PRJNA390139
SAMN07221194	PRJNA390139
SAMN07221195	PRJNA390139
SAMN07221196	PRJNA390139
SAMN07221197	PRJNA390139
SAMN07221198	PRJNA390139
SAMN07221199	PRJNA390139
SAMN07221200	PRJNA390139
SAMN07221201	PRJNA390139
SAMN07221202	PRJNA390139
SAMN07221203	PRJNA390139
SAMN07221204	PRJNA390139
SAMN07221205	PRJNA390139
SAMN07221206	PRJNA390139
SAMN07221207	PRJNA390139
SAMN07221208	PRJNA390139
SAMN07221209	PRJNA390139
SAMN07221210	PRJNA390139
SAMN07221211	PRJNA390139
SAMN07221212	PRJNA390139
SAMN07221213	PRJNA390139
SAMN07221214	PRJNA390139
SAMN07221215	PRJNA390139
SAMN07221216	PRJNA390139
SAMN07221217	PRJNA390139
